# Supplementary material
Source: PubMed Central journal article supplement (PMC2658100)
Supplement: M808942200_1.pdf [file M808942200_1.pdf]

**Supplemental Table 1.** Synthetic oligonucleotides used to generate of constructs used in this study.

| Name                    | Sequence (5'-3')                                 |
|-------------------------|--------------------------------------------------|
| pVOTE.POLYA441G         | GAAGATTGCAGGAGGATTCGGCTTC                        |
| pVOTE.POLYA441G c       | GAAGCCGAATCCTCCTGCAATCTTC                        |
| pVOTE.POLYF442G         | GAAGATTGCAGGAGCAGGCGGCTTCAAAGAC                  |
| pVOTE.POLYF442G c       | GTCTTTGAAGCCGCCTGCTCCTGCAATCTTC                  |
| pVOTE.POLYA441G/F442G   | CCTGAAGATTGCAGGAGGAGGCGGCTTCAAAGACATAATCC        |
| pVOTE.POLYA441G/F442G c | GGATTATGTCTTTGAAGCCGCCTCCTCCTGCAATCTTCAGG        |
| pVOTE.POLYD391N         | GTTACAGAATACGGCCGATTTAATCCAGGAGCCATGAACTACAC     |
| pVOTE.POLYD391N c       | GTGTAGTTCATGGCTCCTGGATTAAATCGGCCGTATTCTGTAAC     |
| pVOTE.POLYD431N         | GTGAATACTTCATGGAGGTGGCCAATCTCAACTCTCCCCTGAAGATTG |
| pVOTE.POLYD431N c       | CAATCTTCAGGGGAGAGTTGAGATTGGCCACCTCCATGAAGTATTCAC |

**Supplemental Table 2.** Data collection and refinement statistics.

| <b>Data collection</b>                              | D431N             |
|-----------------------------------------------------|-------------------|
| Space group                                         | P2 <sub>1</sub> 3 |
| Cell dimensions                                     |                   |
| <i>a</i> = <i>b</i> = <i>c</i> (Å)                  | 326.72            |
| Wavelength                                          | 0.933             |
| Resolution (Å)                                      | 50-3.1            |
| <i>R</i> <sub>sym</sub>                             | 0.12              |
| <i>I</i> /σ <i>I</i>                                | 9.3               |
| Completeness (%)                                    | 99.0              |
| Redundancy                                          | 5.3               |
| <b>Refinement</b>                                   |                   |
| Resolution (Å)                                      | 20.0-3.1          |
| No. reflections                                     | 187110            |
| Cutoff                                              | 3σ <sub>F</sub>   |
| <i>R</i> <sub>work</sub> / <i>R</i> <sub>free</sub> | 0.28/0.28         |
| No. residues                                        |                   |
| Protein                                             | 428               |
| Ligand/ion                                          | 1                 |
| Water                                               | -                 |
| Averaged B-factors                                  | 26.7              |
| R.m.s deviations                                    |                   |
| Bond lengths (Å)                                    | 0.006             |
| Bond angles (°)                                     | 0.803             |
